# Supplementary material for: Changing optical properties of Black Carbon and Brown Carbon aerosols during long-range transport from the Indo-Gangetic Plain to the equatorial Indian Ocean
Source: Copernicus journal article supplement (doi:10.5194/egusphere-2024-104), 2024-01-17
Supplement: Supplementary file 1 [file egusphere-2024-104-supplement.pdf]

## Supplementary Information

# Changing optical properties of Black Carbon and Brown Carbon aerosols during long-range transport from the Indo-Gangetic Plain to the equatorial Indian Ocean

5 Krishnakant Budhavant<sup>1,4</sup>, Mohanan Remain Manoj<sup>2</sup>, Samuel Mwaniki Gaita<sup>2</sup>, Henry Holmstrand<sup>2</sup>, Abdus Salam<sup>3</sup>, Ahmed Muslim<sup>1</sup>, Sreedharan Krishnakumari Satheesh<sup>4</sup>, Örjan Gustafsson<sup>2</sup>

<sup>1</sup>Maldives Meteorological Services, 02020, Maldives

10 <sup>2</sup>Department of Environmental Science and the Bolin Centre for Climate Research, Stockholm University, Stockholm 1069, Sweden

<sup>3</sup>Department of Chemistry, University of Dhaka, Dhaka 1000, Bangladesh

<sup>4</sup>Divecha Centre for Climate Change, Indian Institute of Science, Bangalore 560012, India

15 *Correspondence to:* Örjan Gustafsson ([Orjan.Gustafsson@aces.su.se](mailto:Orjan.Gustafsson@aces.su.se))

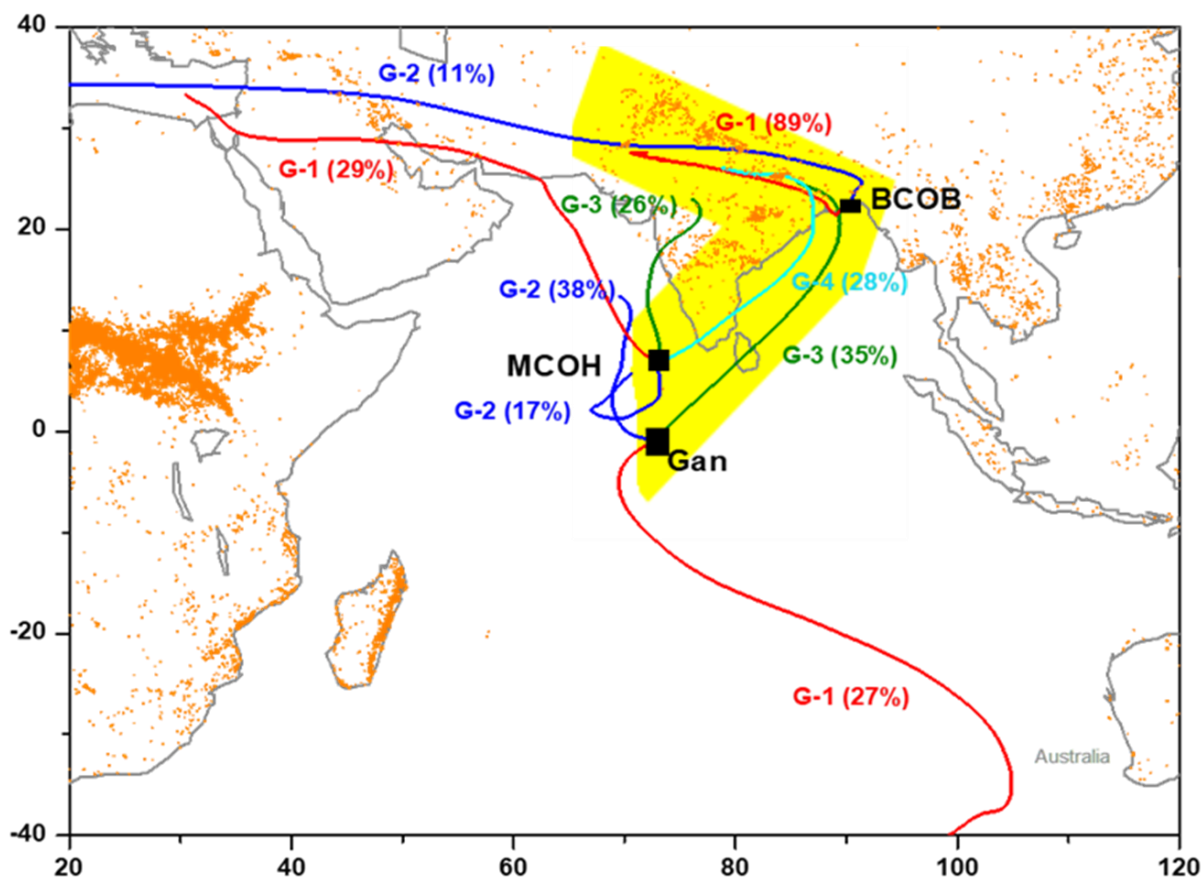

20 Figure S1: The 10-day air mass back trajectory cluster means ending at Bhola Climate Observatory-Bangladesh (BCOB), Maldives Climate Observatory at Hanimaadhoo (MCOH), and Maldives Climate Observatory at Gan (MCOG), at 50 m above mean sea level with MODIS/Aqua active fires from December 2017 to March 2018. G- represents the group number and percentage in brackets and gives information on percentages of trajectories in the group.

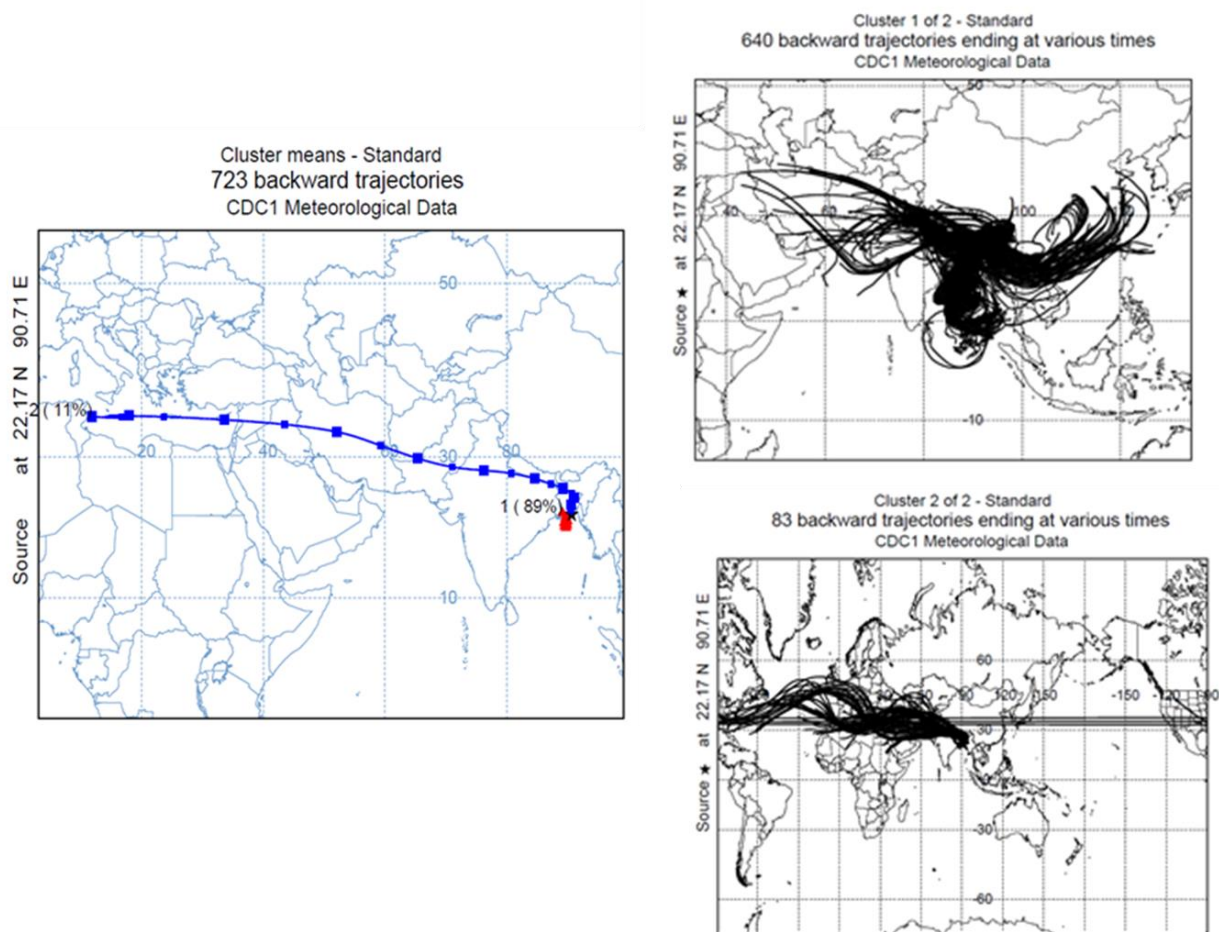

25 **Figure S2:** Ten-day air mass back-trajectories (AMBTs) were generated for Bhola Climate Observatory-Bangladesh (BCOB) at an arrival height of 50 m, computed for every three h using NOAA Hybrid Single-Particle Lagrangian Integrated Trajectory Model (HYSPLIT) version 4.

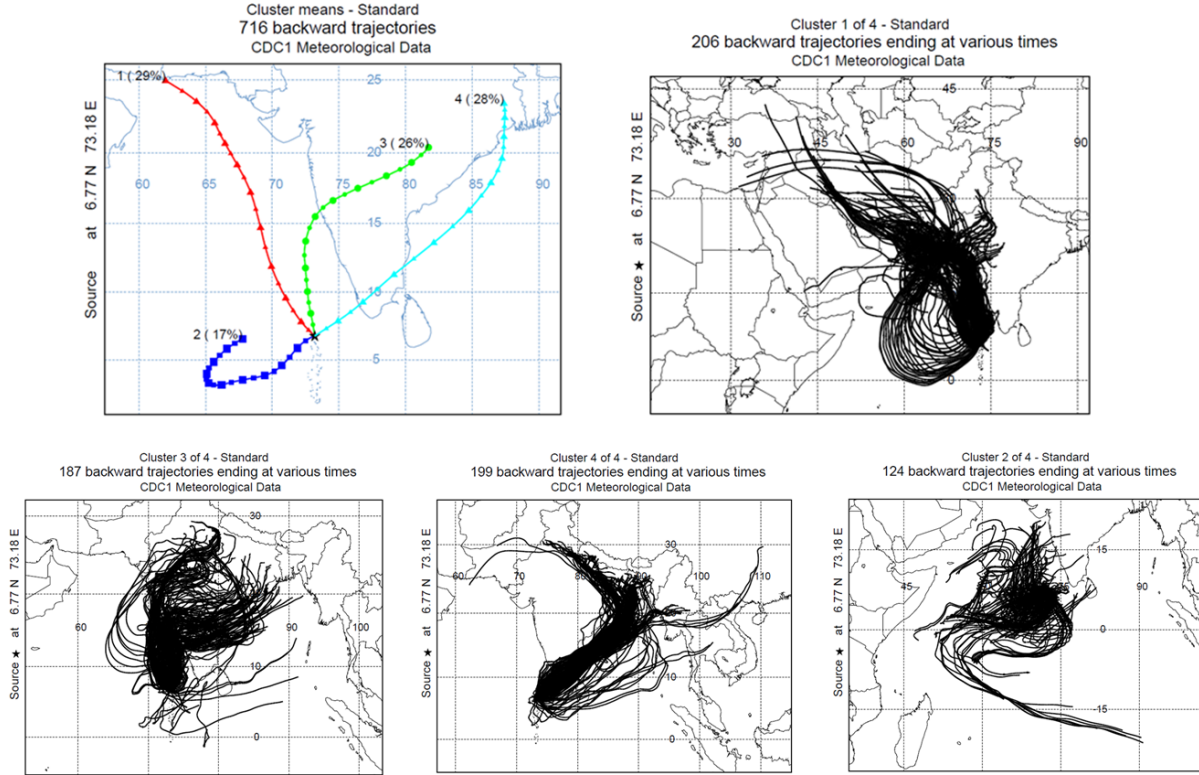

30

**Figure S3: Ten-day air mass back-trajectories (AMBTs) were generated for Maldives Climate Observatory-Hanimaadhoo (MCOH) at an arrival height of 50 m, computed for every three hours using NOAA HYSPLIT model version 4. The AMBTs were clustered into four regions: Western Indian margin, Southern India, IGP, and the Arabian Sea.**

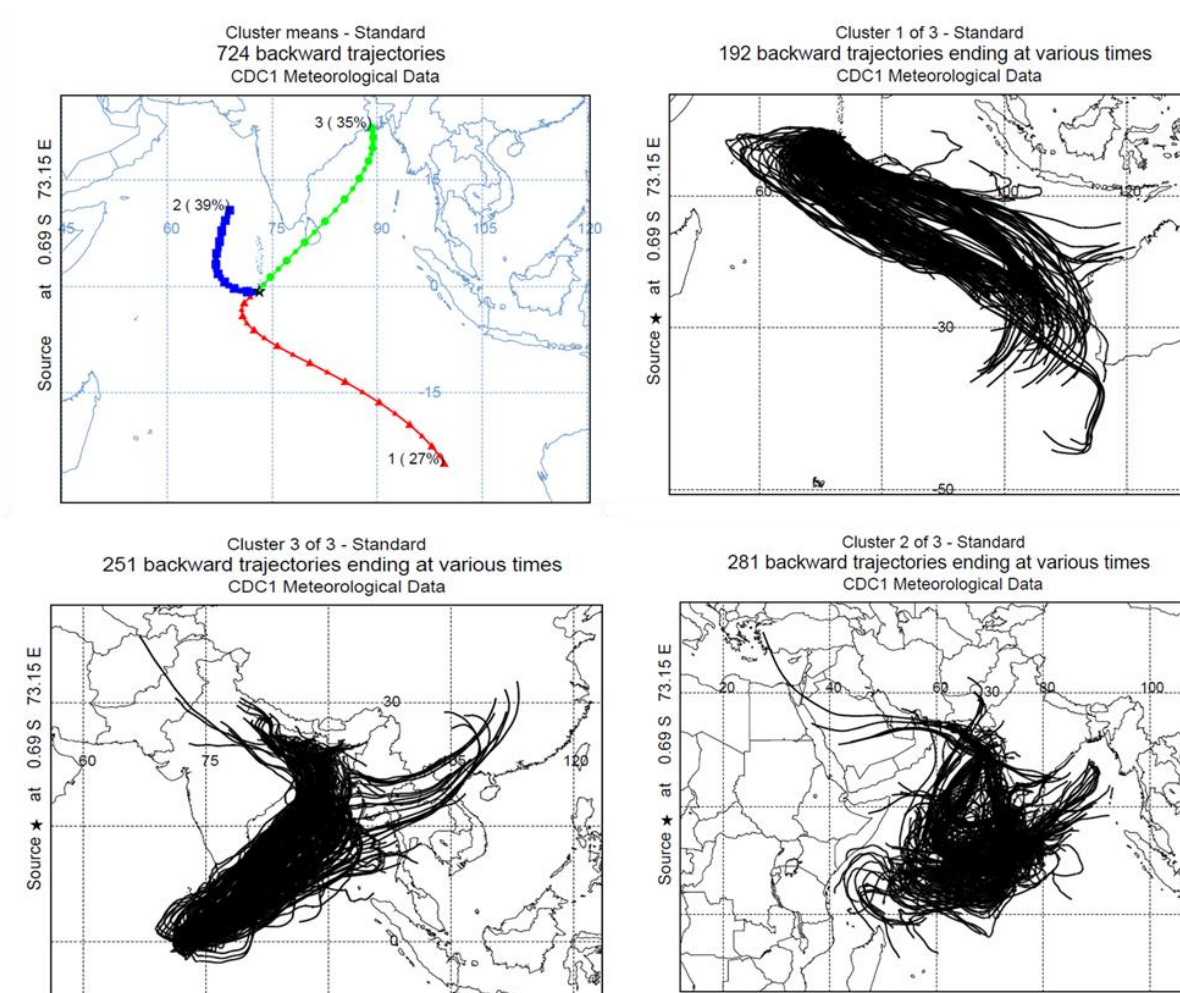

35 **Figure S4: Ten-day air mass back-trajectories (AMBTs) were generated for Maldives Climate Observatory-Gan (MCOG) at an arrival height of 50 m, computed for every three h using NOAA HYSPLIT model version 4. The AMBTs were clustered into four regions: Arabian Sea, IGP, and Indian Ocean.**

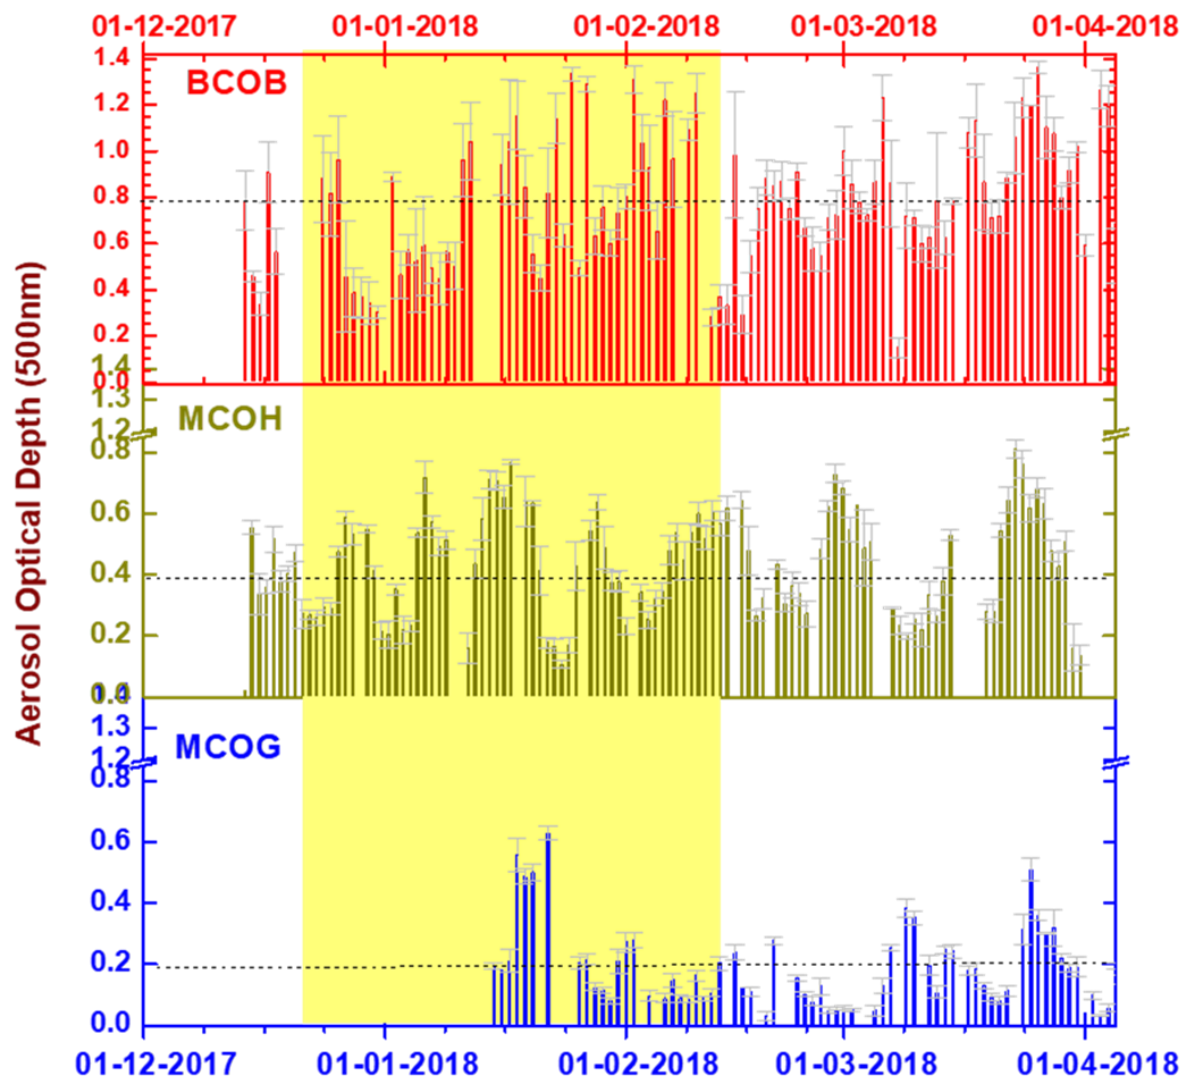

Figure S5. Daily average aerosol optical depth (AOD) measured over Bholā Climate Observatory-Bangladesh (BCOB), Maldives Climate Observatory-Hanimaadhoo (MCOH), and Maldives Climate Observatory-Gan (MCOG) from December 2017 to April 2018. The vertical yellow field indicates the period dominated by air mass transport through the high-pollution source region Indo-Gangetic Plain (IGP).

40

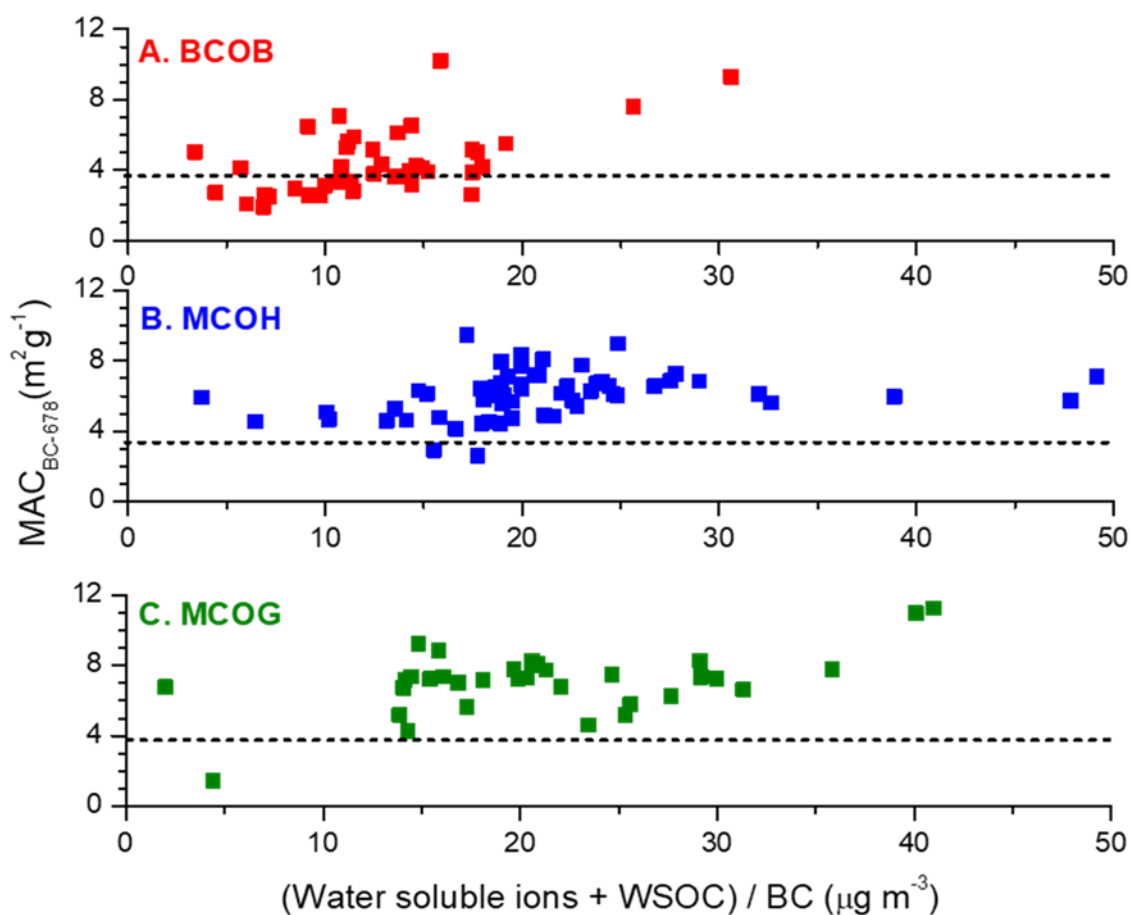

45 Figure S6: The ratio of black carbon (BC) MAC to [(water-soluble ions + WSOC) / BC ] measured at Bhola Climate Observatory-Bangladesh (BCOB), Maldives Climate Observatory-Hanimaadhoo (MCOH), and Maldives Climate Observatory-Gan (MCOG) from December 2017 to April 2018. The horizontal black dotted lines indicate the average MAC ( $3.5\ m^2\ g^{-1}$ ) measured at the BCOB period when air mass transport dominated through the high-pollution source region Indo-Gangetic Plain (IGP).

**Table S1. Matrix of correlation coefficients (r) for the components measured at BCOB station. Correlations coefficients higher than 0.7 are highlighted in bold.**

|                     | OC          | EC          | WSOC        | WIOC        | nss-SO <sub>4</sub> | NO <sub>3</sub> | nss-K       | nss-Ca      | nss-Mg      | NH <sub>4</sub> |
|---------------------|-------------|-------------|-------------|-------------|---------------------|-----------------|-------------|-------------|-------------|-----------------|
| OC                  | <b>1.00</b> | <b>0.85</b> | <b>0.95</b> | <b>0.99</b> | 0.11                | <b>0.80</b>     | <b>0.85</b> | -0.36       | -0.44       | -0.23           |
| EC                  | <b>0.85</b> | <b>1.00</b> | <b>0.79</b> | <b>0.85</b> | -0.05               | 0.55            | <b>0.79</b> | -0.46       | -0.54       | -0.22           |
| WSOC                | <b>0.95</b> | <b>0.79</b> | <b>1.00</b> | <b>0.89</b> | 0.10                | <b>0.76</b>     | <b>0.78</b> | -0.41       | -0.47       | -0.19           |
| WIOC                | <b>0.99</b> | <b>0.85</b> | <b>0.89</b> | <b>1.00</b> | 0.11                | <b>0.78</b>     | <b>0.85</b> | -0.32       | -0.42       | -0.24           |
| nss-SO <sub>4</sub> | 0.11        | -0.05       | 0.10        | 0.11        | <b>1.00</b>         | 0.40            | 0.28        | 0.21        | 0.09        | -0.03           |
| NO <sub>3</sub>     | <b>0.80</b> | 0.55        | <b>0.76</b> | <b>0.78</b> | 0.40                | <b>1.00</b>     | <b>0.77</b> | -0.12       | -0.23       | -0.28           |
| nss-K               | <b>0.85</b> | <b>0.79</b> | <b>0.78</b> | <b>0.85</b> | 0.28                | <b>0.77</b>     | <b>1.00</b> | -0.38       | -0.43       | -0.27           |
| nss-Ca              | -0.36       | -0.46       | -0.41       | -0.32       | 0.21                | -0.12           | -0.38       | <b>1.00</b> | 0.53        | 0.40            |
| nss-Mg              | -0.44       | -0.54       | -0.47       | -0.42       | 0.09                | -0.23           | -0.43       | 0.53        | <b>1.00</b> | 0.05            |
| NH <sub>4</sub>     | -0.23       | -0.22       | -0.19       | -0.24       | -0.03               | -0.28           | -0.27       | 0.40        | 0.05        | <b>1.00</b>     |



**Table S2. Matrix of correlation coefficients (r) for the components in PM<sub>2.5</sub> measured at MCOH. Correlations coefficients higher than 0.7 are highlighted in bold.**

|                           | OC          | EC          | WSOC        | WIOC        | nss-SO <sub>4</sub> | NO <sub>3</sub> | nss-K       | nss-Ca      | nss-Mg      | NH <sub>4</sub> |
|---------------------------|-------------|-------------|-------------|-------------|---------------------|-----------------|-------------|-------------|-------------|-----------------|
| <b>OC</b>                 | <b>1.00</b> | <b>0.74</b> | <b>0.72</b> | <b>0.93</b> | 0.60                | 0.21            | 0.55        | 0.33        | -0.13       | 0.60            |
| <b>EC</b>                 | <b>0.74</b> | <b>1.00</b> | 0.61        | 0.64        | <b>0.78</b>         | 0.40            | <b>0.74</b> | 0.25        | 0.04        | <b>0.78</b>     |
| <b>WSOC</b>               | <b>0.72</b> | 0.61        | <b>1.00</b> | 0.60        | <b>0.82</b>         | 0.32            | <b>0.77</b> | 0.29        | -0.08       | <b>0.83</b>     |
| <b>WIOC</b>               | <b>0.93</b> | 0.64        | 0.60        | <b>1.00</b> | 0.48                | -0.01           | 0.46        | 0.32        | -0.04       | 0.49            |
| <b>nss-SO<sub>4</sub></b> | 0.60        | <b>0.78</b> | <b>0.82</b> | 0.48        | <b>1.00</b>         | 0.38            | <b>0.94</b> | 0.21        | 0.05        | <b>0.99</b>     |
| <b>NO<sub>3</sub></b>     | 0.21        | 0.40        | 0.32        | -0.01       | 0.38                | <b>1.00</b>     | 0.32        | 0.12        | 0.01        | 0.38            |
| <b>nss-K</b>              | 0.55        | <b>0.74</b> | <b>0.77</b> | 0.46        | <b>0.94</b>         | 0.32            | <b>1.00</b> | 0.15        | 0.08        | <b>0.95</b>     |
| <b>nss-Ca</b>             | 0.33        | 0.25        | 0.29        | 0.32        | 0.21                | 0.12            | 0.15        | <b>1.00</b> | 0.23        | 0.19            |
| <b>nss-Mg</b>             | -0.13       | 0.04        | -0.08       | -0.04       | 0.05                | 0.01            | 0.08        | 0.23        | <b>1.00</b> | 0.05            |
| <b>NH<sub>4</sub></b>     | 0.60        | <b>0.78</b> | <b>0.83</b> | 0.49        | <b>0.99</b>         | 0.38            | <b>0.95</b> | 0.19        | 0.05        | <b>1.00</b>     |

55 **Table S3. Matrix of correlation coefficients (r) for the components measured at MCOG station. Correlations coefficients higher than 0.7 are highlighted in bold.**

|                           | OC          | EC          | WSOC        | WIOC        | nss-SO <sub>4</sub> | NO <sub>3</sub> | nss-K       | nss-Ca      | nss-Mg      | NH <sub>4</sub> |
|---------------------------|-------------|-------------|-------------|-------------|---------------------|-----------------|-------------|-------------|-------------|-----------------|
| <b>OC</b>                 | 1.00        | <b>0.83</b> | <b>0.80</b> | <b>0.99</b> | 0.55                | <b>0.68</b>     | 0.26        | 0.56        | 0.39        | 0.43            |
| <b>EC</b>                 | <b>0.83</b> | <b>1.00</b> | <b>0.67</b> | <b>0.83</b> | <b>0.79</b>         | 0.50            | 0.10        | 0.39        | 0.27        | 0.63            |
| <b>WSOC</b>               | <b>0.80</b> | <b>0.67</b> | <b>1.00</b> | <b>0.73</b> | 0.50                | 0.53            | 0.02        | 0.44        | 0.26        | 0.43            |
| <b>WIOC</b>               | <b>0.99</b> | <b>0.83</b> | <b>0.73</b> | <b>1.00</b> | 0.53                | <b>0.68</b>     | 0.30        | 0.56        | 0.39        | 0.41            |
| <b>nss-SO<sub>4</sub></b> | 0.55        | <b>0.79</b> | 0.50        | 0.53        | <b>1.00</b>         | 0.30            | 0.17        | 0.29        | 0.22        | <b>0.78</b>     |
| <b>NO<sub>3</sub></b>     | <b>0.68</b> | 0.50        | 0.53        | <b>0.68</b> | 0.30                | <b>1.00</b>     | 0.24        | <b>0.92</b> | <b>0.85</b> | 0.00            |
| <b>nss-K</b>              | 0.26        | 0.10        | 0.02        | 0.30        | 0.17                | 0.24            | <b>1.00</b> | 0.31        | 0.47        | 0.24            |
| <b>nss-Ca</b>             | 0.56        | 0.39        | 0.44        | 0.56        | 0.29                | <b>0.92</b>     | 0.31        | <b>1.00</b> | 0.91        | 0.04            |
| <b>nss-Mg</b>             | 0.39        | 0.27        | 0.26        | 0.39        | 0.22                | <b>0.85</b>     | 0.47        | 0.91        | <b>1.00</b> | -0.04           |
| <b>NH<sub>4</sub></b>     | 0.43        | 0.63        | 0.43        | 0.41        | <b>0.78</b>         | 0.00            | 0.24        | 0.04        | -0.04       | <b>1.00</b>     |
